# Supplementary material
Source: publisher figshare collection journal article supplement (https://acs.figshare.com/ndownloader/files/14181149)
Supplement: Supplementary file 1 [file 14181149]

# Supporting Information

## Hybrid Au-CuO Nanoparticles: Effect of Structural Features for Selective Benzyl Alcohol Oxidation

Marcello Marelli,<sup>†</sup> Andrea Jouve,<sup>†,‡</sup> Alberto Villa,<sup>†,‡</sup> Rinaldo Psaro,<sup>†</sup> Antonella Balerna,<sup>#</sup> Laura Prati,<sup>†,‡,\*</sup> Claudio Evangelisti,<sup>†,\*</sup>

<sup>†</sup> Istituto di Scienze e Tecnologie Molecolari (ISTM-CNR), Via C. Golgi 19, 20133 Milano, Italy.

<sup>‡</sup> Università degli Studi di Milano, via C. Golgi 19, 20133 Milano, Italy.

<sup>#</sup> Laboratori Nazionali di Frascati, INFN, E. Fermi 40, 00044 Frascati, Roma, Italy.

## Au/C

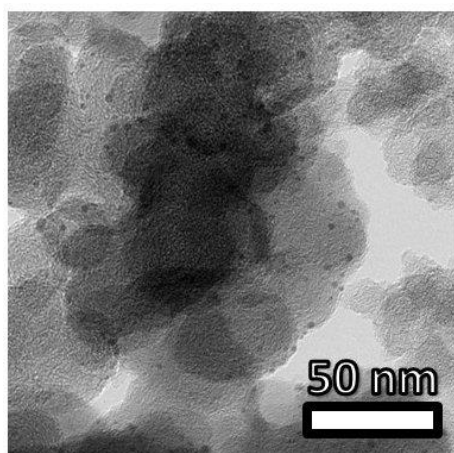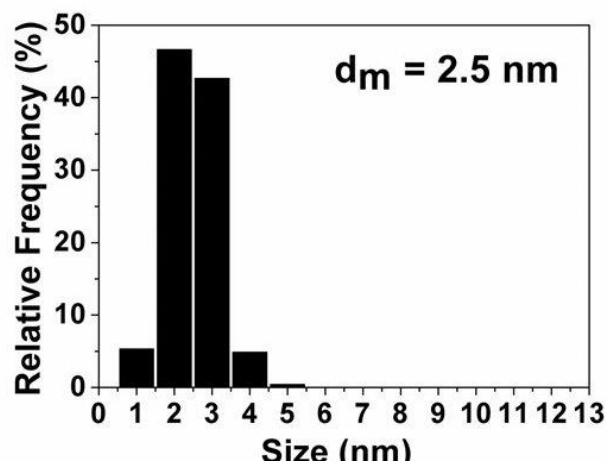

## Au<sub>13</sub>Cu<sub>1</sub>/C

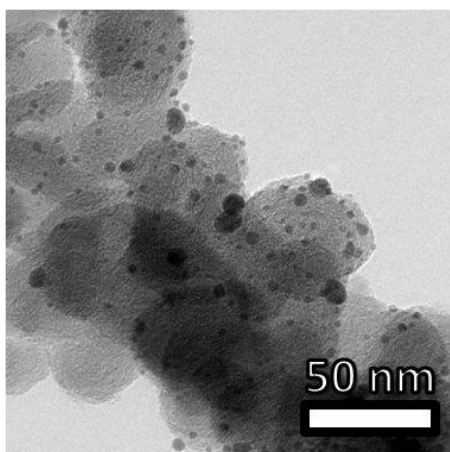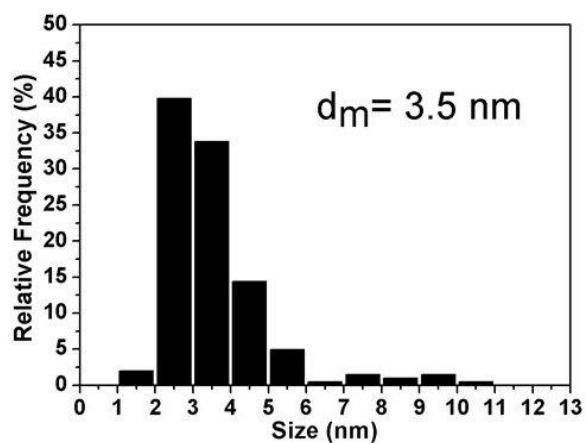

## Au<sub>4</sub>Cu<sub>1</sub>/C

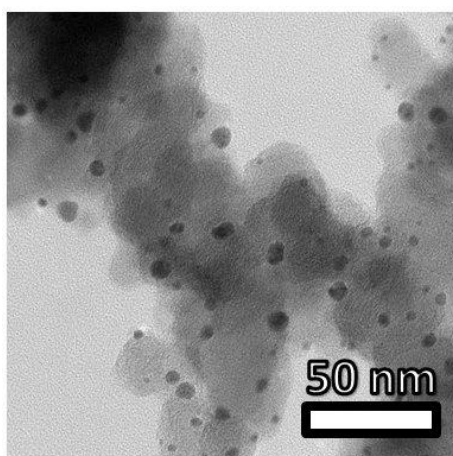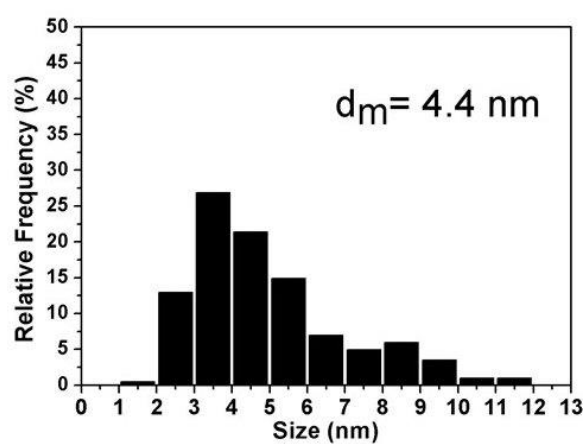

Fig. S1 – Representative TEM micrograph and related size distribution for Au/C (top), Au<sub>13</sub>Cu<sub>1</sub>/C (middle) and Au<sub>4</sub>Cu<sub>1</sub>/C (bottom).

## $\text{Au}_1\text{Cu}_1/\text{C}$

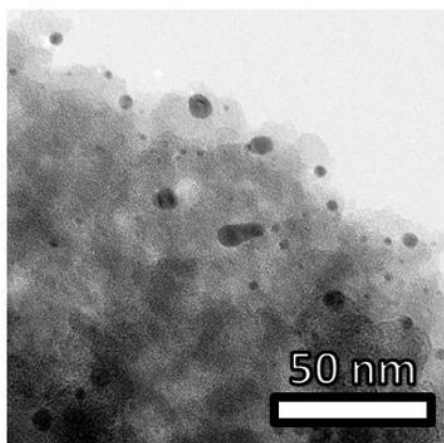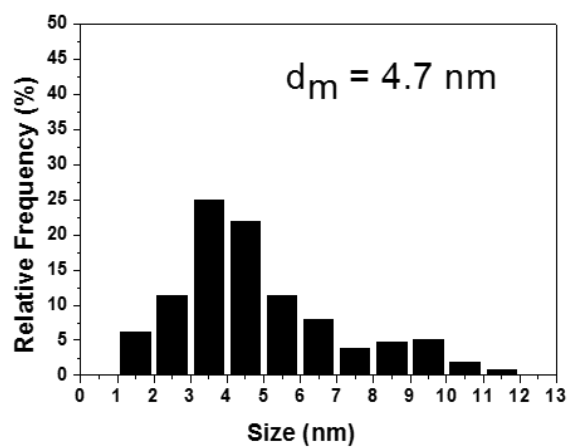

## $\text{Au}_1\text{Cu}_{17}/\text{C}$

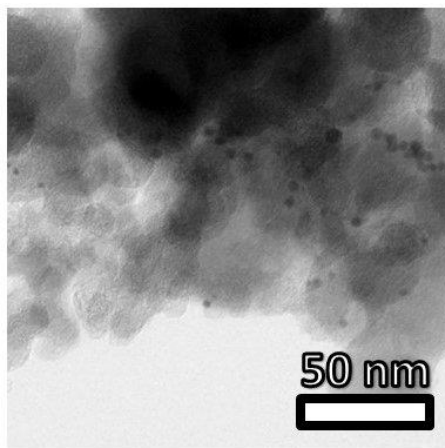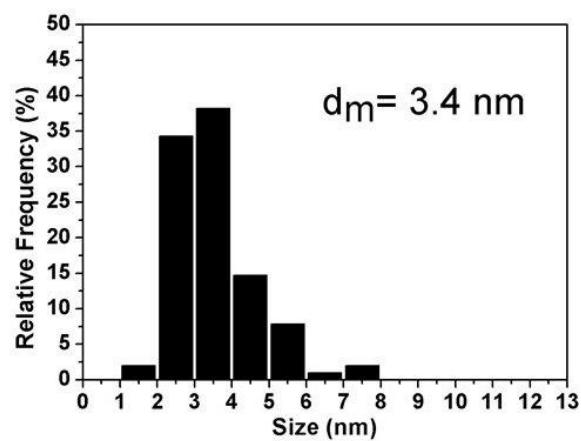

## $\text{Cu}/\text{C}$

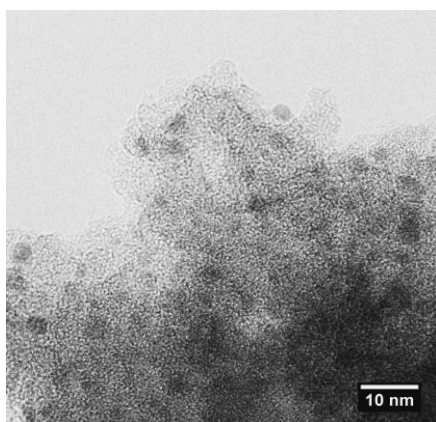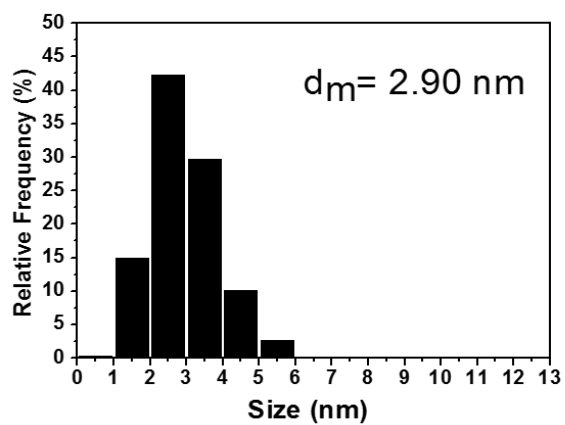

Fig. S2 – Representative TEM micrograph and related size distribution for  $\text{Au}_1\text{Cu}_1/\text{C}$  (top),  $\text{Au}_1\text{Cu}_{17}/\text{C}$  (middle) and  $\text{Cu}/\text{C}$  (bottom).

# $\text{Au}_1\text{Cu}_{17}/\text{C}$

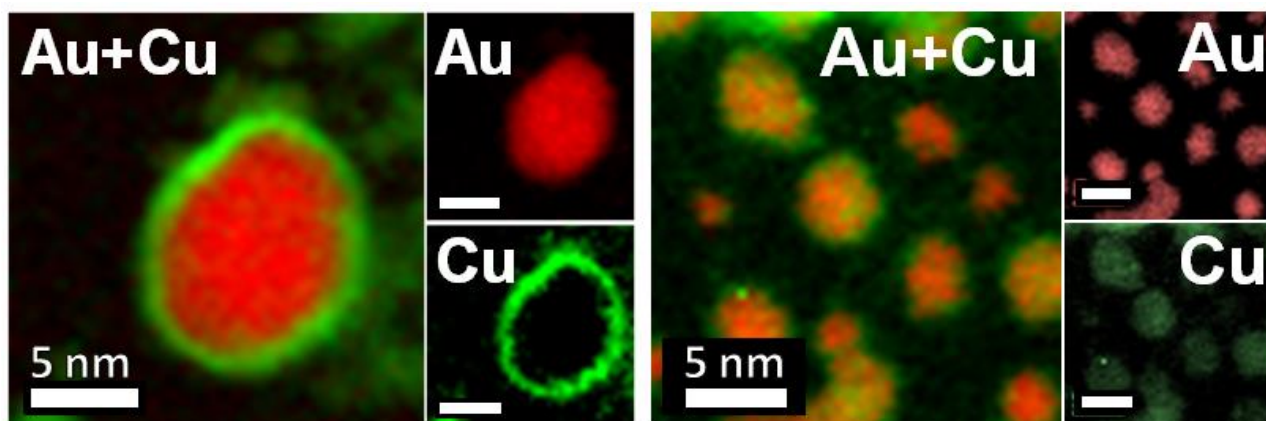

Fig. S3 – Representative STEM-Energy filtered maps for sample  $\text{Au}_1\text{Cu}_{17}$   
 $\text{Au}@2239.0\text{-}2477.0\text{eV} - \text{Cu}@953.0\text{-}1202.0\text{eV}$

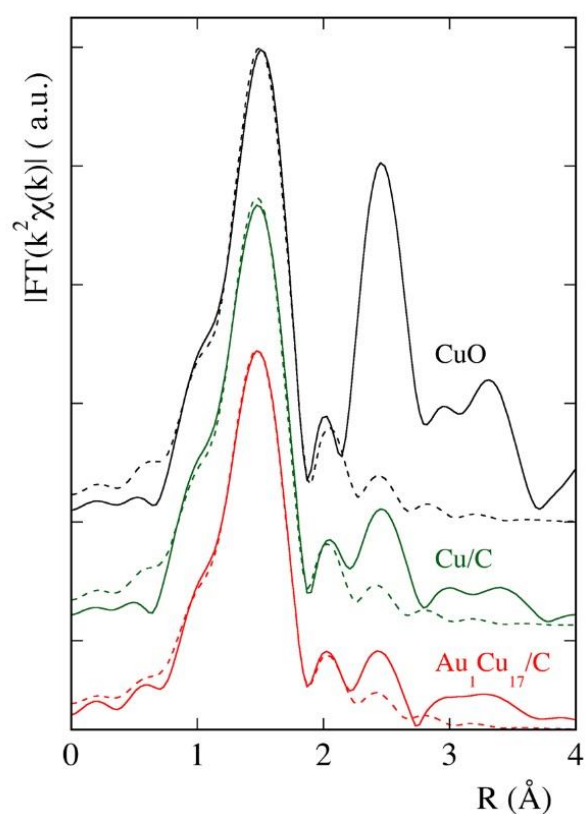

Fig. S4 - Fourier transforms of the experimental (full lines) and theoretical (dashed lines) EXAFS spectra of the  $\text{Au}_1\text{Cu}_{17}/\text{C}$  bimetallic sample compared to the one of monometallic  $\text{Cu}/\text{C}$  and of the  $\text{CuO}$  reference sample ( $\Delta k = (2.5 - 11.4) \text{ \AA}^{-1}$ ).

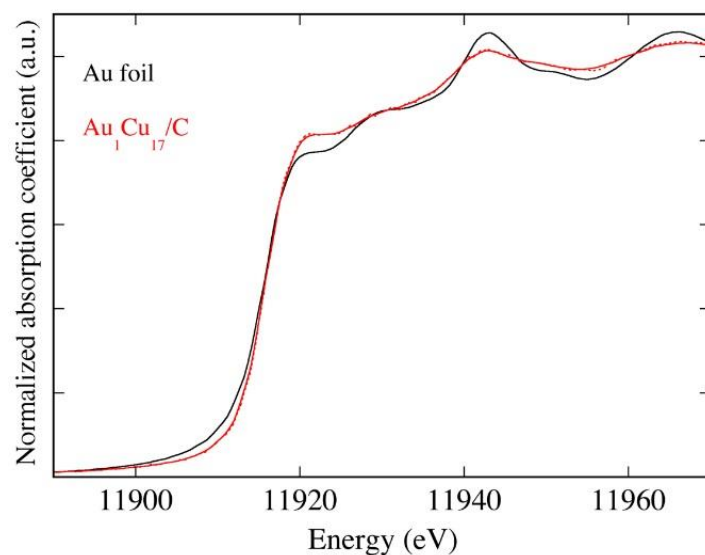

Fig. S5. XANES spectra of the Au foil reference sample and of the bimetallic  $\text{Au}_1\text{Cu}_{17}/\text{C}$  catalyst with the lower Au amount (the full line represents the smoothed experimental data).

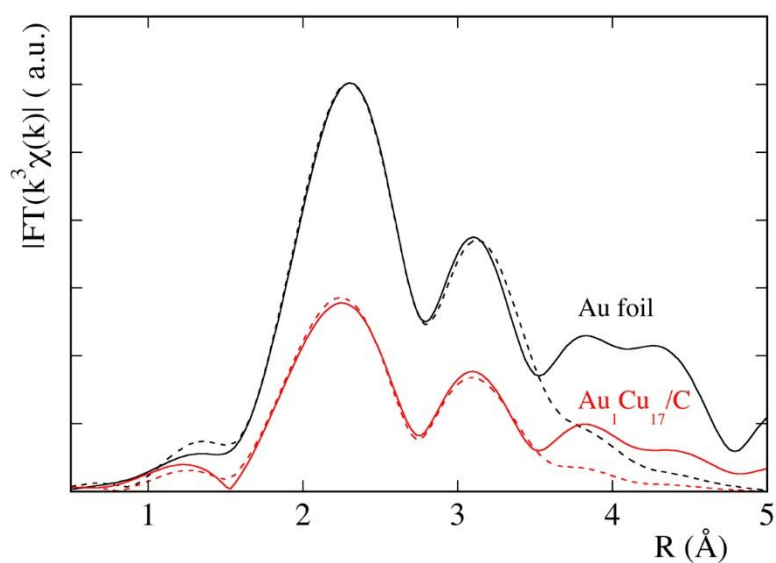

Fig. S6. Fourier transforms of the experimental (full lines) and theoretical (dashed lines) EXAFS spectra of the  $\text{Au}_1\text{Cu}_{17}/\text{C}$  bimetallic sample compared to the one of Au foil reference sample ( $\Delta k = (2.5 - 8.0) \text{\AA}^{-1}$ ).

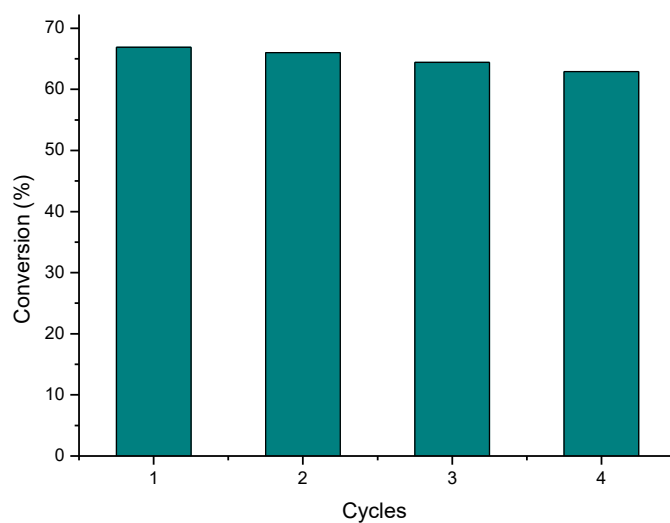

Fig. S7 Stability tests running in 4 reaction cycles of  $\text{Au}_4\text{Cu}_1/\text{C}$  (reaction time 2h).

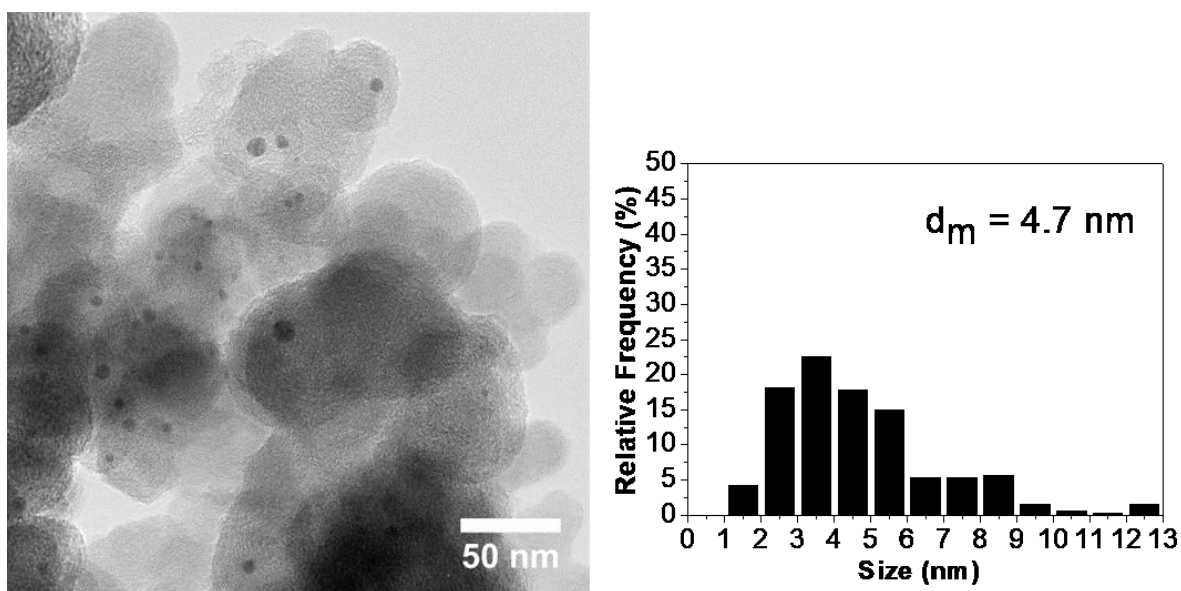

Fig. S8 – Representative TEM micrograph and related size distribution for  $\text{Au}_4\text{Cu}_1/\text{C}$  after 4 catalytic cycles.
